# Supplementary material for: Pre-CAR-T GTE Scoring of Electroencephalogram Abnormalities as a Predictive Biomarker for ICANS
Source: Research Square preprint supplement (doi:10.21203/rs.3.rs-6087514/v1), 2025-03-03
Supplement: Supplementary file 1 [file eca103d3bdf9d07213990c10.xlsx]

## Sheet: Sheet1
Table1. Patient characteristics
Total (N = 55)
Age, median (range)	63 (18-77)
Sex, female, n (%)	22 (40)
Diagnosis, n (%)
Diffuse large B-cell lymphoma	37 (67)
Follicular lymphoma	6 (11)
Transformed follicular lymphoma	3 (5)
High grade B-cell lymphoma	4 (7)
Primary mediastinal large B-cell lymphoma	3 (5)
Intravascular large B-cell lymphoma	1 (2)
B-cell precursor acute lymphoblastic leukemia	1 (2)
Cellular infused product, n (%)
Axi-cel	18 (33)
Tisa-cel	22 (40)
Liso-cel	15 (27)
Disease status, CR, n (%)	21 (38)
Previous CNS-oriented treatment, n (%)†	26 (47)
Toxicity incidence, n (%)
CRS grade
No CRS	3 (5)
Grade1	28 (51)
Grade2	20 (36)
Grade3	4 (7)
Grade4	0 (0)
ICANS grade
No ICANS	39 (71)
Grade1	5 (9)
Grade2	8 (15)
Grade3	3 (5)
Grade4	0 (0)
† Intrethecal chemotherapy or High dose methotrexate-based therapy
